# Supplementary material for: Brewer’s Spent Dry Yeast Modulates Immunity in Gilthead Sea Bream (Sparus aurata)
Source: Frontiers journal article supplement (doi:10.3389/fmars.2022.857592), 2022-04-07
Supplement: Table_1.XLSX [file Table_1.XLSX]

## Sheet: Supplmentary Table 1
Article:	Brewer’s spent dry yeast modulates immunity in gilthead sea bream (Sparus aurata)
Authors:	Ioannis Konstantinidis, Joana P. Firmino, Alberto Ruiz, Bruno Iñarra, David San Martin, Alicia Estévez, Jorge Fernandes, Enric Gisbert
Supplementary Table 1. Number of reads for RNA-senquencing output (raw), quality control and trimming (trimmed), and alignment per treatment per tissue.
	Raw Reads	Trimmed Reads	Unique Alignments	Multiple Alignments	Failed to Align
HK-Control	17796712	17771163	16055771	792898	922494
HK-SDY	19870115	19841646	17940555	790139	1110951
LIV-Control	18855312	18817223	16910913	1187050	719260
LIV-SDY	17418637	17391454	15538316	1198360	654778
INT-Control	21750437	21714338	19511426	745194	1457718
INT-SDY	20990237	20961190	18871695	735242	1354253
HK - Head kidney
LIV - Liver
INT - Intestine
