# Supplementary material for: Brewer’s Spent Dry Yeast Modulates Immunity in Gilthead Sea Bream (Sparus aurata)
Source: Frontiers journal article supplement (doi:10.3389/fmars.2022.857592), 2022-04-07
Supplement: Table_2.XLSX [file Table_2.XLSX]

## Sheet: Suppl. Table 2
Article:	Brewer’s spent dry yeast modulates immunity in gilthead sea bream (Sparus aurata)
Authors:	Ioannis Konstantinidis, Joana P. Firmino, Alberto Ruiz, Bruno Iñarra, David San Martin, Alicia Estévez, Jorge Fernandes, Enric Gisbert
Supplementary Table 2			Values of gene expression of differentially expressed genes (DEGs) from head kidney, liver and intestine of gilthead sea bream fed experimental diets

## Sheet: A) Head Kidney
LOC number - gene acronym	BaseMean	log2(FoldChange)	LfcSE	Stat	P.value	P.adjusted
LOC115581840 - nr5a1a	465.413	7.87146	1.70689	4.61157	4e-06	0.00294349
LOC115595567	21.3455	7.50221	1.906	3.93611	8.28e-05	0.0208883
LOC115568746 - bicc2	203.758	7.32401	1.51398	4.83759	1.31e-06	0.0015124
LOC115567999 - yp11b1	1466.87	7.21063	1.26475	5.70125	1.19e-08	5.72e-05
LOC115567844 - cyp21a2	1155.5	7.18269	1.2832	5.5975	2.17e-08	5.72e-05
hsd3b1	1306.24	7.05821	1.24146	5.68541	1.31e-08	5.72e-05
gata5	85.0417	7.01058	1.71635	4.08459	4.42e-05	0.0123813
LOC115589985 - cyp17a1	1493.44	7.00079	1.27196	5.50395	3.71e-08	8.3e-05		Number of up-regulated DEGs	62	0.626263
LOC115574109 - ifi44l	181.29	6.96859	1.2334	5.64992	1.61e-08	5.72e-05		Number of down-regulated DEGs	37	0.373737
LOC115595637	3471.68	6.77786	1.2077	5.61219	2e-08	5.72e-05
nefh	11.9323	6.66373	1.85429	3.59368	0.000326043	0.0441905		Tota DEGs (HK)	99
th	56.2462	6.45855	1.45927	4.42587	9.61e-06	0.00478003
LOC115575006	146.988	6.37046	1.42537	4.46932	7.85e-06	0.00446684
scg3	448.156	6.28408	1.30652	4.80977	1.51e-06	0.00163663
star	4067.46	6.14262	1.46625	4.18933	2.8e-05	0.00888213
crip2l	182.75	6.01545	1.21954	4.93256	8.12e-07	0.00114954
gpr149	45.2783	5.84956	1.61131	3.63031	0.000283082	0.0412905
LOC115571387	119.177	5.59886	1.33555	4.19216	2.76e-05	0.00888213
pnmt	50.3893	5.49717	1.19869	4.586	4.52e-06	0.00311112
LOC115586293	1158.64	5.31639	1.17657	4.51855	6.23e-06	0.00382163
cacng7a	39.395	4.93011	1.36674	3.6072	0.000309521	0.0431758
LOC115568296 - mchr2	157.839	4.85358	1.26971	3.82259	0.000132058	0.0250678
LOC115567418	222.914	4.74234	1.21202	3.91277	9.12e-05	0.0214819
LOC115589169	111.303	4.26623	1.09504	3.89596	9.78e-05	0.0216566
clstn2a	145.52	4.16974	1.06455	3.91688	8.97e-05	0.0214819
LOC115584978 - pigr	24.7232	3.90126	0.891642	4.37537	1.21e-05	0.00524025
LOC115587823	24.5232	3.85834	0.934596	4.12835	3.65e-05	0.0110288
LOC115589157	16.1975	3.8119	1.06125	3.59189	0.00032829	0.0441905
LOC115577650	23.8584	3.58685	0.872595	4.11055	3.95e-05	0.0115365
LOC115574110 - ifi44l	164.254	3.40667	0.871197	3.91034	9.22e-05	0.0214819
steap2	72.5182	3.30967	0.603042	5.48829	4.06e-08	8.3e-05
LOC115579324 - hla	57.581	3.20225	0.876346	3.65409	0.000258093	0.039347
LOC115575033	26.9465	2.82333	0.754975	3.73963	0.000184292	0.031211
LOC115577686	692.789	2.76536	0.663488	4.16792	3.07e-05	0.00943341
LOC115590635	564.334	2.58689	0.670479	3.85827	0.000114192	0.0230222
LOC115584971	39.4247	2.57245	0.678418	3.79183	0.000149541	0.0269951
LOC115589832	43.4522	2.55533	0.721607	3.54116	0.000398373	0.0484344
LOC115568253 - cxcl10	27.7323	2.49431	0.636972	3.91588	9.01e-05	0.0214819
LOC115595766 - gimap4	804.884	2.39558	0.668687	3.58252	0.0003403	0.0443008
LOC115570701	15.5463	2.31749	0.582318	3.97976	6.9e-05	0.0178906
ebi3	21.453	2.27779	0.644372	3.5349	0.000407923	0.0490921
LOC115576987	60.5721	2.16202	0.607504	3.55885	0.000372482	0.0466124
LOC115581152 - cxc11	200.692	2.12569	0.494384	4.29968	1.71e-05	0.00699891
LOC115594284 - gimap7	47.0031	1.9885	0.535832	3.71105	0.000206405	0.0333381
LOC115589847	22.1657	1.97112	0.551577	3.57361	0.000352087	0.0450207
LOC115568249 -cxc6	138.781	1.91175	0.507801	3.76477	0.000166705	0.0292338
engl	82.7161	1.87189	0.457504	4.09153	4.29e-05	0.0123292
LOC115568250	186.386	1.81028	0.384258	4.7111	2.46e-06	0.00226675
LOC115577177 - cntn5	274.222	1.77797	0.344076	5.16737	2.37e-07	0.000397405
prf1.3	140.168	1.74165	0.494292	3.52352	0.000425858	0.049628
tafa5l	54.6242	1.70681	0.47681	3.57965	0.000344051	0.0443008
LOC115577687	2951.22	1.67963	0.450542	3.72803	0.00019298	0.0322593
acot7	45.3164	1.55451	0.398598	3.89994	9.62e-05	0.0216566
LOC115591532 - tmprss9	166.547	1.43703	0.36792	3.90581	9.39e-05	0.0216145
LOC115566723 - ctss	1775.78	1.41912	0.385474	3.6815	0.000231867	0.0368645
LOC115591531	238.274	1.41787	0.388354	3.65098	0.000261243	0.0394284
LOC115588457 - ifngr1	171.281	1.33207	0.283342	4.70129	2.59e-06	0.00226675
LOC115566899 - siglec5	121.6	1.28408	0.352344	3.64439	0.000268028	0.0398
tnfrsf9a	140.966	1.14899	0.270128	4.25349	2.1e-05	0.00783755
ccl17	611.861	1.13569	0.291942	3.8901	0.000100203	0.0217062
LOC115585860	7907.17	1.07916	0.199249	5.41613	6.09e-08	0.000112138
lima1	619.986	1.00218	0.259439	3.86285	0.000112072	0.0229287
LOC115587343 - pim3	59.0177	-1.02151	0.283383	-3.60469	0.000312531	0.043268
LOC115576217 - hbaa	159833	-1.04621	0.296586	-3.5275	0.000419497	0.0495177
LOC115567340	70.1205	-1.06457	0.250019	-4.25794	2.06e-05	0.00783755
LOC115576209 - hbb	134478	-1.10373	0.283478	-3.89353	9.88e-05	0.0216566
LOC115569376	220.503	-1.12238	0.301404	-3.72383	0.000196222	0.0322593
ldlrad3	300.142	-1.13213	0.243514	-4.64914	3.33e-06	0.00270708
LOC115569030 - rell2	1074.55	-1.13622	0.317374	-3.58005	0.000343528	0.0443008
LOC115588800	88.1348	-1.14746	0.318623	-3.60132	0.000316605	0.0435049
coro2a	67.0451	-1.23802	0.303184	-4.08341	4.44e-05	0.0123813
LOC115592805 - klf1	1060.71	-1.30967	0.329801	-3.97111	7.15e-05	0.018295
LOC115566288 - sptb	4960.91	-1.36294	0.310541	-4.38892	1.14e-05	0.00524025
glipr2	106.375	-1.40387	0.310109	-4.52702	5.98e-06	0.00382163
LOC115584959 - cdc37	2996.05	-1.44357	0.384799	-3.75149	0.000175785	0.0305352
LOC115567493	9302.08	-1.57062	0.409987	-3.8309	0.000127675	0.0244884
LOC115595314 - mical3	336.681	-1.64162	0.465378	-3.52749	0.000419527	0.0495177
LOC115573772	15.6141	-1.64762	0.442206	-3.72592	0.000194608	0.0322593
LOC115580958 - gimap8	168.749	-1.74491	0.396854	-4.39686	1.1e-05	0.00518534
LOC115573936	692.172	-1.75809	0.404867	-4.34239	1.41e-05	0.00589814
LOC115581573 - ank1a	4566.62	-1.77878	0.4746	-3.74795	0.000178284	0.0306798
LOC115574138	278.255	-1.89738	0.408374	-4.64618	3.38e-06	0.00270708
LOC115572552 - plcd1b	49.703	-1.91479	0.543945	-3.52019	0.000431244	0.049628
rhpn1	23.4673	-1.9872	0.548126	-3.62544	0.000288471	0.041497
LOC115577741	277.518	-2.21766	0.584091	-3.79678	0.000146589	0.0267242
LOC115577684	13.0606	-2.40543	0.659712	-3.64618	0.000266168	0.0398
LOC115589764 - lrat	28.1401	-2.45462	0.680413	-3.60754	0.000309113	0.0431758
mak	38.9603	-2.50101	0.702693	-3.55919	0.000372005	0.0466124
cdk18	55.6133	-2.52073	0.641996	-3.9264	8.62e-05	0.0214552
LOC115589310	10.9767	-2.57051	0.668639	-3.84439	0.000120852	0.0236728
LOC115572340 - ap1s3	44.9215	-2.77349	0.715031	-3.87884	0.000104954	0.0224711
LOC115590088 - npr1	88.0779	-2.82717	0.616751	-4.58398	4.56e-06	0.00311112
LOC115580434	12.5448	-3.32644	0.787215	-4.22558	2.38e-05	0.00841048
LOC115587642	37.4658	-3.91681	1.07203	-3.65362	0.000258567	0.039347
LOC115587195 - trim24	20.7847	-4.51489	1.01089	-4.46626	7.96e-06	0.00446684
LOC115567754 - ceacam2	4.23295	-5.24295	1.46321	-3.5832	0.000339414	0.0443008
LOC115592348 - loxhd1b	7.61121	-6.11275	1.22212	-5.00175	5.68e-07	0.000871715
LOC115568104 - ceacam6	14.761	-6.48436	1.46485	-4.42663	9.57e-06	0.00478003
LOC115584268	99.3182	-9.83167	1.09297	-8.99534	2.36e-19	4.34e-15

## Sheet: B) Liver
LOC number - gene acronym	BaseMean	log2(FoldChange)	LfcSE	Stat	P.value	P.adjusted
LOC115585361	9.77892	5.07354	1.40025	3.62331	0.000290857	0.049783
LOC115589783	74.7431	4.41087	1.16617	3.78237	0.000155343	0.0354514
LOC115576519 - kynu	18.4482	4.21042	0.937358	4.49179	7.06255e-06	0.0054978
LOC115578593 - hla	12.4052	4.06239	1.07844	3.76691	0.000165281	0.0359764
LOC115578591 - hla	15.3371	3.73631	0.914777	4.0844	4.41914e-05	0.0171905
cish	504.217	3.69286	0.845391	4.36823	1.25259e-05	0.00818068
LOC115566036 - ifi27	16.6925	3.55135	0.893709	3.97372	7.0758e-05	0.0206048
LOC115578912 - rftn1a	5.34546	3.41514	0.79376	4.30249	1.68892e-05	0.0090336
atf3	343.578	3.18989	0.399172	7.99127	1.33554e-15	2.28591e-11
LOC115570192 -gars1	372.666	3.15936	0.790115	3.99861	6.3716e-05	0.0199813
LOC115570192 -ifnar2	105.972	3.07303	0.550665	5.58058	2.39722e-08	8.20616e-05				Number of up-regulated DEGs	52	0.693333
LOC115571230 - socs3	607.558	2.95051	0.43354	6.80562	1.00613e-11	5.74033e-08				Number of down-regulated DEGs	23	0.306667
fosl2	425.753	2.67965	0.41683	6.42864	1.28751e-10	5.50924e-07
camk2n2	9.56089	2.58691	0.69439	3.72544	0.000194972	0.0397279				Tota DEGs (HK)	75
trib1	297.79	2.51199	0.488291	5.14446	2.68295e-07	0.000459214
LOC115570503 - ccl20	358.412	2.46571	0.629977	3.91397	9.07927e-05	0.0235456
psat1	268.123	2.41667	0.596131	4.05393	5.03645e-05	0.0177446
phgdh	227.067	2.38515	0.348594	6.84219	7.79906e-12	5.74033e-08
LOC115589427	7.53206	2.38155	0.597897	3.98321	6.79909e-05	0.0204164
LOC115571642 - aldh18a1	84.0809	2.15837	0.573159	3.76575	0.000166052	0.0359764
LOC115574290 - hsp90aa1.2	110.479	2.06532	0.482088	4.2841	1.83479e-05	0.00937757
fosl1	87.9001	2.01229	0.485667	4.14335	3.42275e-05	0.0142887
LOC115571230 - socs3	140.781	1.9568	0.419128	4.66874	3.03046e-06	0.00272997
LOC115592325 - cd276	191.926	1.91148	0.470994	4.05839	4.94126e-05	0.0177446
otc	177.628	1.8917	0.443469	4.26569	1.99289e-05	0.0094751
mthfd1l	116.742	1.87581	0.395025	4.7486	2.04831e-06	0.00219118
gdf15	204.381	1.75127	0.459917	3.80779	0.000140215	0.0324313
apoc1	597.396	1.72111	0.444951	3.8681	0.000109688	0.027609
LOC115580267 - tle3b	318.214	1.67642	0.354657	4.72688	2.28001e-06	0.00229557
flvcr1	17.0246	1.59674	0.431436	3.70098	0.000214769	0.0417726
actb1	3911.13	1.58286	0.374497	4.22661	2.37237e-05	0.0106856
gadd45b	96.1896	1.53817	0.370653	4.14989	3.32631e-05	0.0142333
LOC115588457 - ifblr1	20.5238	1.53227	0.374934	4.08677	4.37418e-05	0.0171905
sall1	1247.09	1.52988	0.399195	3.83243	0.000126885	0.0301634
myc	266.813	1.50973	0.308161	4.89916	9.62463e-07	0.00117668
LOC115574870 - coq10a	331.673	1.36254	0.347544	3.92047	8.83758e-05	0.0235456
LOC115572259 - them6	31.7944	1.33472	0.365197	3.65479	0.000257394	0.0473716
slc7a3	1201.42	1.32719	0.307097	4.32172	1.54816e-05	0.00901984
LOC115594794 - rars1	83.5878	1.31834	0.325361	4.05192	5.07997e-05	0.0177446
wars1	434.545	1.30993	0.362202	3.61657	0.00029853	0.0499118
stk40	273.582	1.27746	0.319621	3.99679	6.42074e-05	0.0199813
hemk1	41.0594	1.23926	0.237155	5.22551	1.73673e-07	0.000330287
snrpa	128.521	1.22704	0.333106	3.68364	0.000229931	0.0442191
gadd45g	271.948	1.18656	0.216915	5.47016	4.49639e-08	0.000128267
lurap1l	105.151	1.17369	0.312662	3.75385	0.00017414	0.03722
LOC115592083 - rnf14	102.143	1.16211	0.279315	4.16057	3.1746e-05	0.0139324
tbx2	753.876	1.15681	0.295509	3.91465	9.05367e-05	0.0235456
yrdc	52.8347	1.12288	0.281414	3.99014	6.60348e-05	0.0201831
zfp36l2	672.47	1.09617	0.20595	5.32251	1.02343e-07	0.000218963
LOC115591440 - fmo-5	1553.16	1.08556	0.2472	4.39141	1.1262e-05	0.00771039
LOC115582122 - sec14l1	122.643	1.04272	0.241939	4.30985	1.63365e-05	0.00901984
LOC115578322 - gsdme	88.942	1.02872	0.274252	3.75099	0.00017614	0.03722
mafb	87.5386	-1.00812	0.276861	-3.64126	0.00027131	0.0484037
shroom3	30.7618	-1.04852	0.260976	-4.01771	5.87672e-05	0.0189785
ssbp4	30.1149	-1.11511	0.282786	-3.94331	8.03631e-05	0.0229249
cahz	188.794	-1.29673	0.29828	-4.34736	1.37788e-05	0.00842279
ank1a	239.123	-1.32725	0.326825	-4.06105	4.88518e-05	0.0177446
LOC115576215 - hbab	1776.06	-1.43533	0.391664	-3.6647	0.000247631	0.0465763
LOC115590768	18.5842	-1.47316	0.337747	-4.36171	1.29048e-05	0.00818068
LOC115578621 - atad2	16.4715	-1.57046	0.37135	-4.22906	2.34669e-05	0.0106856
LOC115592006	399.738	-1.60779	0.37641	-4.27138	1.94264e-05	0.0094751
LOC115594176	23.3113	-1.68742	0.429452	-3.92924	8.52137e-05	0.0234416
aldh1l1	6827.17	-1.716	0.347742	-4.9347	8.02747e-07	0.00114498
LOC115594179 -h3c1	40.5718	-1.72753	0.38788	-4.45378	8.43712e-06	0.00627869
stk33	36.1409	-1.7363	0.464208	-3.74036	0.00018376	0.0383565
acss2l	684.079	-1.76222	0.486717	-3.62061	0.000293905	0.0498068
fabp7a	1689.03	-1.76494	0.448175	-3.93806	8.21437e-05	0.0230487
LOC115582232 - bhmt	11039.2	-1.84005	0.39376	-4.67303	2.96784e-06	0.00272997
LOC115582231 - bhmt	1133.15	-1.9806	0.462677	-4.28073	1.8628e-05	0.00937757
acap3a	30.0378	-2.03863	0.415166	-4.9104	9.08923e-07	0.00117668
LOC115590320 - camta2	43.5526	-2.78209	0.737461	-3.77252	0.000161607	0.0359764
LOC115577016 - nlrp12	24.0856	-3.15196	0.701734	-4.49167	7.06658e-06	0.0054978
cfap206	16.3192	-3.49269	0.914768	-3.81812	0.000134475	0.0315297
LOC115589521 - parp14	11.6824	-3.76318	0.947231	-3.97282	7.10262e-05	0.0206048
LOC115586830 - trim21	4.89491	-3.899	0.956435	-4.0766	4.56991e-05	0.0173819

## Sheet: C) Intestine
LOC number - gene acronym	BaseMean	log2(FoldChange)	LfcSE	Stat	P.value	P.adjusted
samd3	95.4612	7.32506	1.75728	4.16841	3.06726e-05	0.0256791
LOC115589840	43.3618	6.29352	1.22691	5.12958	2.90393e-07	0.00103331
LOC115588739 - gimap5	15.9133	5.64521	1.45247	3.88663	0.000101646	0.0442887
LOC115584438 - chia	22.8377	5.53	1.04412	5.29631	1.18168e-07	0.000542319
LOC115582423	229.712	5.25447	1.18627	4.42941	9.44918e-06	0.0130156
c1qc	18.8298	4.87913	1.17439	4.15461	3.25842e-05	0.0256791
cfd	14.3737	4.62028	1.11634	4.13878	3.4916e-05	0.0256791			Number of up-regulated DEGs	27	0.613636
LOC115585885	286.199	4.60778	0.739266	6.23291	4.57859e-10	9.7753e-06			Number of down-regulated DEGs	17	0.386364
LOC115594395	14.859	4.43376	0.970426	4.56888	4.90342e-06	0.00747772
LOC115578801 - eef1a1	586.042	3.56418	0.717136	4.97002	6.69443e-07	0.0020418			Tota DEGs (HK)	44
LOC115590993 - ifit2	31.8127	3.30559	0.860884	3.83976	0.000123155	0.0487703
LOC115578017- ephx2	27.7407	2.93629	0.753236	3.89824	9.68962e-05	0.0439525
LOC115573103 - trim16	50.2642	2.90283	0.662298	4.38296	1.17077e-05	0.0131558
LOC115584003	108.553	2.45727	0.582984	4.21499	2.49788e-05	0.0242408
LOC115584009	110.066	2.35161	0.59328	3.96375	7.37822e-05	0.0369548
LOC115589808 - btn3a1	459.516	2.28506	0.538505	4.24333	2.20225e-05	0.023509
LOC115582400	516.674	2.21525	0.558662	3.96528	7.331e-05	0.0369548
LOC115585860	5459.27	2.04807	0.494557	4.14121	3.45472e-05	0.0256791
LOC115586843 - ces2	82.3906	1.8578	0.468945	3.96167	7.44289e-05	0.0369548
LOC115575650	380.215	1.79221	0.387779	4.62174	3.80527e-06	0.00624943
LOC115590067	3095.8	1.75295	0.454735	3.85489	0.000115783	0.0484698
LOC115589573	102.139	1.57764	0.389903	4.04624	5.20459e-05	0.0292416
LOC115588458 - ifnar2	168.362	1.49451	0.358229	4.17195	3.01998e-05	0.0256791
LOC115590013 - fclr5	3531.51	1.46308	0.376985	3.881	0.000104027	0.0444197
LOC115573101 - trim16	258.443	1.35612	0.288615	4.6987	2.61829e-06	0.00553544
LOC115590482	49.4327	1.32299	0.280487	4.71677	2.39614e-06	0.00553544
lgals3bp	1955.66	1.29036	0.314215	4.10661	4.01517e-05	0.0267887
LOC115578787	114.667	-1.05634	0.275134	-3.83936	0.000123353	0.0487703
LOC115589080 - pdl1	37.7191	-1.26257	0.286707	-4.40369	1.06423e-05	0.0130156
st6gal1	109.877	-1.53773	0.378919	-4.05821	4.94503e-05	0.0292416
LOC115594276 - gdpd5	135.768	-1.62804	0.2915	-5.58502	2.33667e-08	0.000166293
sez6	53.6486	-1.85385	0.452619	-4.09584	4.20644e-05	0.0272144
fam189a1	77.3728	-1.99346	0.422417	-4.71918	2.36794e-06	0.00553544
LOC115582649 - chnra7	30.6482	-2.03928	0.358126	-5.69432	1.23864e-08	0.000132224
LOC115590064	36.0659	-2.17752	0.528051	-4.12369	3.72859e-05	0.0256791
LOC115583933	158.834	-2.18414	0.545421	-4.0045	6.21496e-05	0.0340229
lama5	270.196	-2.22987	0.579393	-3.84864	0.000118777	0.0487673
LOC115590261 - tmem184c	14.4008	-2.33788	0.599014	-3.90288	9.50538e-05	0.0439525
LOC115578668 - hla	109.346	-2.4122	0.580162	-4.1578	3.21326e-05	0.0256791
LOC115591548 - casp6	641.696	-2.52491	0.659371	-3.82927	0.000128526	0.0498914
hao2	63.2089	-2.55576	0.580546	-4.40234	1.07089e-05	0.0130156
rarb	94.6145	-2.97612	0.720787	-4.12898	3.64369e-05	0.0256791
LOC115566466 - adh1	617.812	-3.33304	0.82369	-4.04647	5.1995e-05	0.0292416
LOC115592943	5.31279	-5.81193	1.1001	-5.28311	1.27007e-07	0.000542319
