# Supplementary material for: Brewer’s Spent Dry Yeast Modulates Immunity in Gilthead Sea Bream (Sparus aurata)
Source: Frontiers journal article supplement (doi:10.3389/fmars.2022.857592), 2022-04-07
Supplement: Table_3.XLSX [file Table_3.XLSX]

## Sheet: Ms details, Suppl. Table 3
Article:	Brewer’s spent dry yeast modulates immunity in gilthead sea bream (Sparus aurata)
Authors:	Ioannis Konstantinidis, Joana P. Firmino, Alberto Ruiz, Bruno Iñarra, David San Martin, Alicia Estévez, Jorge Fernandes, Enric Gisbert
Supplementary Table 3. Functional enrichment analysis of differentially expressed genes in the head kidney of fish fed the SDY diet in comparison to the control diet.

## Sheet: Head Kidney - Upregulated SDY
source	term_name	term_id	adjusted_p_value	negative_log10_of_adjusted_p_value	term_size	query_size	intersection_size	effective_domain_size	intersections
GO:MF	monooxygenase activity	GO:0004497	0.0025	2.60509	91	27	4	15725	LOC115567999,LOC115567844,LOC115589985,TH
GO:MF	chemokine activity	GO:0008009	0.0085	2.06985	44	27	3	15725	LOC115581152,LOC115568249,CCL17
GO:MF	chemokine receptor binding	GO:0042379	0.0085	2.06985	44	27	3	15725	LOC115581152,LOC115568249,CCL17
GO:MF	oxidoreductase activity, acting on paired donors, with incorporation or reduction of molecular oxygen	GO:0016705	0.0107	1.97073	132	27	4	15725	LOC115567999,LOC115567844,LOC115589985,TH
GO:MF	iron ion binding	GO:0005506	0.0124	1.90796	137	27	4	15725	LOC115567999,LOC115567844,LOC115589985,TH
GO:MF	G protein-coupled receptor binding	GO:0001664	0.0453	1.34405	77	27	3	15725	LOC115581152,LOC115568249,CCL17
GO:MF	cytokine activity	GO:0005125	0.0453	1.34405	77	27	3	15725	LOC115581152,LOC115568249,CCL17
GO:BP	steroid metabolic process	GO:0008202	0	5.25174	44	21	5	12200	LOC115567999,LOC115567844,HSD3B1,LOC115589985,STAR
GO:BP	glucocorticoid metabolic process	GO:0008211	0.005	2.29807	3	21	2	12200	LOC115567999,LOC115567844
GO:BP	steroid biosynthetic process	GO:0006694	0.0083	2.07896	28	21	3	12200	LOC115567844,HSD3B1,STAR
HP	Renal salt wasting	HP:0000127	0.0014	2.84398	18	7	3	4981	LOC115567844,HSD3B1,STAR
HP	Adrenal hyperplasia	HP:0008221	0.0045	2.3428	26	7	3	4981	LOC115567844,HSD3B1,STAR
HP	Adrenogenital syndrome	HP:0000840	0.0053	2.27674	3	7	2	4981	LOC115567844,STAR
HP	Congenital adrenal hyperplasia	HP:0008258	0.0176	1.75444	5	7	2	4981	HSD3B1,STAR
HP	Abnormal circulating dehydroepiandrosterone concentration	HP:0500022	0.0492	1.30816	8	7	2	4981	HSD3B1,STAR

## Sheet: Head Kidney - Downregulated SDY
source	term_name	term_id	adjusted_p_value	negative_log10_of_adjusted_p_value	term_size	query_size	intersection_size	effective_domain_size	intersections
GO:MF	oxygen carrier activity	GO:0005344	0.0003	3.59144	3	15	2	15725	LOC115576217,LOC115576209
GO:MF	oxygen binding	GO:0019825	0.0145	1.83939	19	15	2	15725	LOC115576217,LOC115576209
GO:MF	molecular carrier activity	GO:0140104	0.0195	1.7095	22	15	2	15725	LOC115576217,LOC115576209
GO:CC	hemoglobin complex	GO:0005833	0.0062	2.2049	14	9	2	7259	LOC115576217,LOC115576209
HP	Abnormal erythrocyte physiology	HP:0020054	0	4.90353	23	7	4	4981	LOC115576217,LOC115566288,LOC115567493,LOC115581573
HP	Reticulocytosis	HP:0001923	0.0004	3.4243	52	7	4	4981	LOC115576217,LOC115566288,LOC115567493,LOC115581573
HP	Increased red cell osmotic fragility	HP:0005502	0.001	3.00696	16	7	3	4981	LOC115566288,LOC115567493,LOC115581573
HP	Pallor	HP:0000980	0.001	2.98068	175	7	5	4981	LOC115576217,LOC115566288,LOC115567493,LOC115581573,LOC115589764
HP	Poikilocytosis	HP:0004447	0.0013	2.87334	71	7	4	4981	LOC115576217,LOC115566288,LOC115567493,LOC115581573
HP	Chills	HP:0025143	0.0014	2.84398	18	7	3	4981	LOC115566288,LOC115567493,LOC115581573
HP	Abnormal reticulocyte morphology	HP:0004312	0.0033	2.47697	89	7	4	4981	LOC115576217,LOC115566288,LOC115567493,LOC115581573
HP	Hypercoagulability	HP:0100724	0.0035	2.45103	24	7	3	4981	LOC115576217,LOC115566288,LOC115581573
HP	Abnormal mean corpuscular hemoglobin concentration	HP:0025546	0.0035	2.45103	24	7	3	4981	LOC115576217,LOC115566288,LOC115581573
HP	Extramedullary hematopoiesis	HP:0001978	0.0057	2.24295	28	7	3	4981	LOC115576217,LOC115566288,LOC115581573
HP	Cholelithiasis	HP:0001081	0.0065	2.1886	105	7	4	4981	LOC115576217,LOC115566288,LOC115567493,LOC115581573
HP	Hyperbilirubinemia	HP:0002904	0.0093	2.03049	115	7	4	4981	LOC115576217,LOC115566288,LOC115567493,LOC115581573
HP	Abnormal circulating bilirubin concentration	HP:0033479	0.0093	2.03049	115	7	4	4981	LOC115576217,LOC115566288,LOC115567493,LOC115581573
HP	Abnormal gallbladder morphology	HP:0012437	0.0103	1.9858	118	7	4	4981	LOC115576217,LOC115566288,LOC115567493,LOC115581573
HP	Hemolytic anemia	HP:0001878	0.0152	1.81804	130	7	4	4981	LOC115576217,LOC115566288,LOC115567493,LOC115581573
HP	Anemia due to reduced life span of red cells	HP:0011895	0.0152	1.81804	130	7	4	4981	LOC115576217,LOC115566288,LOC115567493,LOC115581573
HP	Abnormality of the gallbladder	HP:0005264	0.0172	1.76564	134	7	4	4981	LOC115576217,LOC115566288,LOC115567493,LOC115581573
HP	Abnormal circulating dicarboxylic acid concentration	HP:0010995	0.0204	1.68998	140	7	4	4981	LOC115576217,LOC115566288,LOC115567493,LOC115581573
HP	Congenital hemolytic anemia	HP:0004804	0.0492	1.30816	8	7	2	4981	LOC115566288,LOC115567493
