# Supplementary material for: Brewer’s Spent Dry Yeast Modulates Immunity in Gilthead Sea Bream (Sparus aurata)
Source: Frontiers journal article supplement (doi:10.3389/fmars.2022.857592), 2022-04-07
Supplement: Table_4.XLSX [file Table_4.XLSX]

## Sheet: Ms details, Suppl. Table 4
Article:	Brewer’s spent dry yeast modulates immunity in gilthead sea bream (Sparus aurata)
Authors:	Ioannis Konstantinidis, Joana P. Firmino, Alberto Ruiz, Bruno Iñarra, David San Martin, Alicia Estévez, Jorge Fernandes, Enric Gisbert
Supplementary Table 4. Functional enrichment analysis of differentially expressed genes in the liver of fish fed the SDY diet in comparison to the control diet.

## Sheet: Liver - Upregulated SDY
source	term_name	term_id	adjusted_p_value	negative_log10_of_adjusted_p_value	term_size	query_size	intersection_size	effective_domain_size	intersections
GO:BP	cellular amino acid metabolic process	GO:0006520	0.000331929	3.47895	151	26	6	12200	PSAT1,PHGDH,LOC115571642,OTC,LOC115594794,WARS1
GO:BP	L-serine biosynthetic process	GO:0006564	0.00711152	2.14804	3	26	2	12200	PSAT1,PHGDH
GO:BP	carboxylic acid metabolic process	GO:0019752	0.0132716	1.87708	286	26	6	12200	PSAT1,PHGDH,LOC115571642,OTC,LOC115594794,WARS1
GO:BP	oxoacid metabolic process	GO:0043436	0.0132716	1.87708	286	26	6	12200	PSAT1,PHGDH,LOC115571642,OTC,LOC115594794,WARS1
GO:BP	organic acid metabolic process	GO:0006082	0.0135357	1.86852	287	26	6	12200	PSAT1,PHGDH,LOC115571642,OTC,LOC115594794,WARS1
GO:BP	alpha-amino acid biosynthetic process	GO:1901607	0.022233	1.653	32	26	3	12200	PSAT1,PHGDH,LOC115571642
GO:BP	cellular amino acid biosynthetic process	GO:0008652	0.0267473	1.57272	34	26	3	12200	PSAT1,PHGDH,LOC115571642
GO:BP	L-serine metabolic process	GO:0006563	0.0495201	1.30522	7	26	2	12200	PSAT1,PHGDH
HP	Hypoglycinemia	HP:0012277	0.00412301	2.38479	2	10	2	4981	PSAT1,PHGDH
HP	Hyposerinemia	HP:0012279	0.0123558	1.90813	3	10	2	4981	PSAT1,PHGDH
HP	Abnormal circulating serine concentration	HP:0012278	0.0410977	1.38618	5	10	2	4981	PSAT1,PHGDH

## Sheet: Liver - Downregulated SDY
source	term_name	term_id	adjusted_p_value	negative_log10_of_adjusted_p_value	term_size	query_size	intersection_size	effective_domain_size	intersections
HP	Abnormal erythrocyte physiology	HP:0020054	0.0084995	2.07061	23	2	2	4981	LOC115581573,LOC115576215
HP	Abnormal mean corpuscular hemoglobin concentration	HP:0025546	0.00927218	2.03282	24	2	2	4981	LOC115581573,LOC115576215
HP	Hypercoagulability	HP:0100724	0.00927218	2.03282	24	2	2	4981	LOC115581573,LOC115576215
HP	Extramedullary hematopoiesis	HP:0001978	0.0126989	1.89624	28	2	2	4981	LOC115581573,LOC115576215
HP	Reticulocytosis	HP:0001923	0.0445468	1.35118	52	2	2	4981	LOC115581573,LOC115576215
