# Supplementary material for: Brewer’s Spent Dry Yeast Modulates Immunity in Gilthead Sea Bream (Sparus aurata)
Source: Frontiers journal article supplement (doi:10.3389/fmars.2022.857592), 2022-04-07
Supplement: Table_5.XLSX [file Table_5.XLSX]

## Sheet: Ms details, Suppl. Table 5
Article:	Brewer’s spent dry yeast modulates immunity in gilthead sea bream (Sparus aurata)
Authors:	Ioannis Konstantinidis, Joana P. Firmino, Alberto Ruiz, Bruno Iñarra, David San Martin, Alicia Estévez, Jorge Fernandes, Enric Gisbert
Supplementary Table 5. Functional enrichment analysis of differentially expressed genes in the intestine of fish fed the SDY diet in comparison to the control diet.
No results for the enrichment analysis of down-regulated genes is provided, since we did not get any results on this issue.

## Sheet: Intestine - Upregulated SDY
source	term_name	term_id	adjusted_p_value	negative_log10_of_adjusted_p_value	term_size	query_size	intersection_size	effective_domain_size	intersections
GO:MF	lysozyme activity	GO:0003796	1.13125e-08	7.94644	3	9	3	15725	LOC115582423,LOC115582400,LOC115585860
GO:MF	peptidoglycan muralytic activity	GO:0061783	2.26055e-07	6.64579	6	9	3	15725	LOC115582423,LOC115582400,LOC115585860
GO:MF	hydrolase activity, hydrolyzing O-glycosyl compounds	GO:0004553	1.0315e-05	4.98653	89	9	4	15725	LOC115584438,LOC115582423,LOC115582400,LOC115585860
GO:MF	hydrolase activity, acting on glycosyl bonds	GO:0016798	7.7721e-05	4.10946	147	9	4	15725	LOC115584438,LOC115582423,LOC115582400,LOC115585860
GO:BP	cell wall macromolecule catabolic process	GO:0016998	7.00223e-09	8.15476	3	5	3	12200	LOC115582423,LOC115582400,LOC115585860
GO:BP	cell wall macromolecule metabolic process	GO:0044036	7.00223e-09	8.15476	3	5	3	12200	LOC115582423,LOC115582400,LOC115585860
GO:BP	cell wall organization or biogenesis	GO:0071554	7.00223e-09	8.15476	3	5	3	12200	LOC115582423,LOC115582400,LOC115585860
GO:BP	peptidoglycan metabolic process	GO:0000270	1.39993e-07	6.85389	6	5	3	12200	LOC115582423,LOC115582400,LOC115585860
GO:BP	peptidoglycan catabolic process	GO:0009253	1.39993e-07	6.85389	6	5	3	12200	LOC115582423,LOC115582400,LOC115585860
GO:BP	aminoglycan catabolic process	GO:0006026	3.91884e-07	6.40684	8	5	3	12200	LOC115582423,LOC115582400,LOC115585860
GO:BP	glycosaminoglycan catabolic process	GO:0006027	3.91884e-07	6.40684	8	5	3	12200	LOC115582423,LOC115582400,LOC115585860
GO:BP	glycosaminoglycan metabolic process	GO:0030203	1.07583e-05	4.96826	22	5	3	12200	LOC115582423,LOC115582400,LOC115585860
GO:BP	aminoglycan metabolic process	GO:0006022	1.23705e-05	4.90761	23	5	3	12200	LOC115582423,LOC115582400,LOC115585860
GO:BP	carbohydrate derivative catabolic process	GO:1901136	1.60616e-05	4.79421	25	5	3	12200	LOC115582423,LOC115582400,LOC115585860
GO:BP	cellular macromolecule catabolic process	GO:0044265	0.0127611	1.89411	225	5	3	12200	LOC115582423,LOC115582400,LOC115585860
GO:BP	macromolecule catabolic process	GO:0009057	0.0166535	1.77849	246	5	3	12200	LOC115582423,LOC115582400,LOC115585860
GO:BP	organonitrogen compound catabolic process	GO:1901565	0.0172663	1.7628	249	5	3	12200	LOC115582423,LOC115582400,LOC115585860
